# Supplementary material for: A Preclinical Systematic Review and Meta-Analysis of Behavior Testing in Mice Models of Ischemic Stroke
Source: MDPI journal article supplement (doi:10.3390/life13020567), 2023-02-17

## Supplementary Material

Supplementary Table S1

| Molecules/cells and procedures                                                                                                                        | Articles                                                                                                                                                                                                                       |
|-------------------------------------------------------------------------------------------------------------------------------------------------------|--------------------------------------------------------------------------------------------------------------------------------------------------------------------------------------------------------------------------------|
| hypoxia-inducible factor-1 $\alpha$ (HIF-1 $\alpha$ )                                                                                                 | Bok et al. (2017)                                                                                                                                                                                                              |
| low-intensity pulsed ultrasound                                                                                                                       | Chen et al. (2018)                                                                                                                                                                                                             |
| tissue-type plasminogen activator                                                                                                                     | Draxler et al. (2018)                                                                                                                                                                                                          |
| miR-132                                                                                                                                               | Zuo et al. (2019), Feng et al. (2021)                                                                                                                                                                                          |
| antagonist 8-cyclopentyl-1,3-dipropylxanthine                                                                                                         | Geng et al. (2020)                                                                                                                                                                                                             |
| agonist 2-Chloro-N6-cyclopentyladenosine                                                                                                              |                                                                                                                                                                                                                                |
| aripiprazol                                                                                                                                           | Gil et al. (2018)                                                                                                                                                                                                              |
| PR-957                                                                                                                                                | Guo et al. (2018)                                                                                                                                                                                                              |
| stem cells                                                                                                                                            | Kawai et al. (2010), Patkar et al. (2011), Huang et al. (2014), Cunningham et al. (2020), Doeppner et al. (2014), Kawai et al. (2010), Ma et al. (2015), Wang et al. (2015), Wang et al. (2020)                                |
| irisin                                                                                                                                                | Li et al. (2016), Jin et al. (2021)                                                                                                                                                                                            |
| chloral hydrate                                                                                                                                       | Liu et al. (2015)                                                                                                                                                                                                              |
| RhPDCD5protein                                                                                                                                        | Lu et al. (2016)                                                                                                                                                                                                               |
| miR-216a                                                                                                                                              | Shuang et al. (2017/2018)                                                                                                                                                                                                      |
| progesteron                                                                                                                                           | Wong et al. (2014)                                                                                                                                                                                                             |
| adenoviruses-mediated RNA interference                                                                                                                | Wu et al. (2017)                                                                                                                                                                                                               |
| targeting cytosolicphospholipase A2 $\alpha$                                                                                                          |                                                                                                                                                                                                                                |
| IL-33                                                                                                                                                 | Yang et al. (2017)                                                                                                                                                                                                             |
| shengmai powder (insenoside Rb1, ruscogenin and schisandrin A,                                                                                        | Zhang et al. (2020)                                                                                                                                                                                                            |
| no treatment                                                                                                                                          | Suenaga-Young et al. (2016), Truong et al. (2012), Feng et al. (2020), Kamat et al. (2015), Li et al. (2018), Oliveira et al. (2020), Pallast et al. (2020), Park et al. (2014), Vahid-Ansari et al. (2016), Yan et al. (2021) |
| Korean medicinal herbs (Polygonum multiflorum Thunb., Rehmannia glutinosa (Gaertn) Libosch., Polygala tenuifolia Willd., and Acorus gramineus Soland) | Ahn et al. (2015)                                                                                                                                                                                                              |
| metallothionein-1                                                                                                                                     | Campagne et al. (1999)                                                                                                                                                                                                         |
| dihydrocapsaicin                                                                                                                                      | Cao et al. (2017)                                                                                                                                                                                                              |
| glycyrrhizin                                                                                                                                          | Chen et al. (2017)                                                                                                                                                                                                             |
| methylene blue                                                                                                                                        | Cheng et al. 2021                                                                                                                                                                                                              |
| lipopolysaccharide                                                                                                                                    | Doll et al. (2015)                                                                                                                                                                                                             |
| recombinant human fibroblast growth factor 21                                                                                                         | Dongxue et al. (2020)                                                                                                                                                                                                          |
| coicis semen                                                                                                                                          | Du et al. (2021)                                                                                                                                                                                                               |
| MLC901 (herbal extract preparation derived from Chinese medicine)                                                                                     | Gandin et al. (2015)                                                                                                                                                                                                           |
| DLX6-AS1 (lncRNA mus distal-less homeobox 6 antisense 1)                                                                                              | Hu et al. (2020)                                                                                                                                                                                                               |

|                                                             |                              |
|-------------------------------------------------------------|------------------------------|
| octadecylpropyl sulfamide                                   | Kossatz et al. (2018)        |
| cystamine                                                   | Li et al. (2014)             |
| OGG1 glycosylase (7,8-Dihydro-8-oxoguanine DNA glycosylase) | Liu et al. (2011)            |
| Hematopoietic Growth Factor                                 | Liu et al. (2016)            |
| korean red ginseng                                          | Liu et al. (2018)            |
| (R)-4-ACPBPA, (S)-4-ACPBPA                                  | Nieuwenhuijzen et al. (2021) |
| pharmacological inhibitor of NLRP3 (CY-09)                  | Sun et al. (2020)            |
| S100A11                                                     | Xia et al. (2018)            |
| heat shock protein 72                                       | Xu et al. (2011)             |
| synthetic peptide LP17                                      | Xu et al. (2019)             |

Supplementary Table S2

| Neurological scale |      |         |            |         |                    |               |
|--------------------|------|---------|------------|---------|--------------------|---------------|
| Study / Year       | Sham | Control | Weight (g) | Age (w) | Neurological scale | Test day      |
| Zuo 2019           | 6    | 6       | 20–25      | -       | Garcia             | 1             |
| Zhang 2020         | 8    | 8       | 18-22      | 6-12    | Garcia             | 1             |
| Shuang 2017        | 3    | 3       | -          | 6       | Garcia             | 1             |
| Lu 2016            | 18   | 18      | -          | -       | Garcia             | 1             |
| Geng 2020          | -    | -       | 20-25      | -       | Garcia             | 1             |
| Wong 2014          | 3    | 3       | 25,9-41,2  | 15-25   | Clark              | 1, 7          |
| Patkar 2011        | 8    | 8       | 25-30      | 14-12   | Clark              | 1, 2, 7       |
| Li 2016            | 8    | 8       | -          | 8-12    | Longa              | 3             |
| Wu 2017            | 3    | 3       | -          | 12-16   | Longa              | 1, 3, 7, 14   |
| Kamat 2015         | 5    | 5       | 27-30      | 10-12   | Longa              | 1             |
| Cheng 2021         | 10   | 10      | 20-24      | -       | Garcia             | 1             |
| Hu 2020            | 6    | 6       | 18-25      | 8       | Clark              | 1             |
| Du 2021            | 5    | 5       | 25-30      | -       | Longa              | 1,3,5,7,10,14 |

Supplementary Table S3

| Foot fault    |      |         |            |         |                 |                    |
|---------------|------|---------|------------|---------|-----------------|--------------------|
| Study / Year  | Sham | Control | Weight (g) | Age (w) | Test day        | Testing time (min) |
| Zuo 2019      | 6    | 6       | 20–25      | -       | 0, 7, 14, 21,28 | 2                  |
| Guo 2018      | 10   | 10      | 18-20      | 6-8     | 1, 2, 3         | 2                  |
| Wong 2014     | 4    | 4       | 25,9-41,2  | 15-25w  | 1, 2, 7         | -                  |
| Feng 2021     | 6    | 6       | 22-25      | -       | 1               | 2                  |
| Draxler 2019  | 7    | 7       | 25         | 8-12    | 1               | 5                  |
| Cao 2017      | 8    | 11      | 21-32      | 10-16   | 0,3,7,14,21,28  | 2                  |
| Doeppner 2014 | 15   | 16      | 23-25      | 10-12   | 4,7,14,28,56,84 | -                  |
| Xu 2011       | 11   | 20      | 23-32      | -       | 0,2,8,28        | -                  |

**Supplementary Table S4**

| Cylinder            |      |         |            |         |                             |                    |                              |
|---------------------|------|---------|------------|---------|-----------------------------|--------------------|------------------------------|
| Study / Year        | Sham | Control | Weight (g) | Age (w) | Test day                    | Testing time (min) | Cylinder size                |
| Yang 2017           | 8-12 | 8-12    |            | 8-12    | 0, 3, 5, 7                  | 10                 | 9 cm diameter, 15 cm height  |
| Patkar 2011         | 8    | 8       | 25-30      | 14-12   | 0, 2, 14, 28                | 2                  | 10 cm diameter               |
| Gil 2018            | 6    | 6       | 18-20      | 6       | 1-5, 5-9, 10-14             | -                  | 9 cm diameter, 15 cm height  |
| Vahid-Ansari 2016   | 10   | 10      | 25-28      | 10-11   | 30                          | -                  | 10 cm diameter, 15 cm height |
| Pallast 2020        | 7    | 15      |            | 8       | 0,3,7,14,21,28              | 5                  | 10 cm diameter, 15 cm height |
|                     | 10   | 19      | 22-29      | 10-14   | 0,1,3,7,14,21,28            | 15                 |                              |
|                     | 10   | 10      | 25-30      | 12-16   | 0,1,3,5,7                   | 5                  | 12 cm diameter, 19 cm height |
| Doll 2015           |      |         |            |         |                             |                    |                              |
| Wang 2015           | 6-8  | 6-8     |            |         | 0,3,5,7,9,11,13,15,20,25,28 |                    | 5 cm diameter, 20 cm height  |
|                     | 8    | 8       | 20-25,5    | 8-10    |                             | 5                  | 10 cm diameter, 15 cm height |
| Nieuwenhuijzen 2021 |      |         |            |         | 0,7,14,28,42                |                    |                              |
|                     | 10   | 10      |            | 8-12    | 0,7,14,28,42                |                    | 10 cm diameter, 15 cm height |
| Wang 2020           | 14   | 14      | 22-28      | 8-9     | 0,3,7,14,21,28              | 5                  |                              |
| Liu 2018            | 8    | 12      |            |         | 0,1,2,3,7,14,21,28          | 6                  | 8cm diameter, 25 cm height   |

**Supplementary Table S5**

| Rotarod             |      |         |            |         |                             |                    |                  |            |          |
|---------------------|------|---------|------------|---------|-----------------------------|--------------------|------------------|------------|----------|
| Study / Year        | Sham | Control | Weight (g) | Age (w) | Test day                    | Testing time (min) | Velocities (rpm) | Trials/day | Training |
| Truong 2012         | 10   | 5       | 20,3-25,3  | 4       | 2, 4, 7, 14, 21, 28, 42, 56 | 2                  | 4-40             | 4          | No       |
| Suenagaa-Young 2016 | 8    | 8       | -          | 10      | 1, 3, 5, 7, 14, 21, 35      | 2                  | 4-40             | 3          | Yes      |

Supplementary Material

|                    |      |      |           |       |                                  |        |            |    |     |
|--------------------|------|------|-----------|-------|----------------------------------|--------|------------|----|-----|
| Bok 2017           | 4    | 4    | -         | -     | 1,3,5,7                          | 5      | 4-40       | 5  | Yes |
| Liu 2015           | 6    | 6    | -         | -     | 0, 1, 3, 7, 28                   | 2      | 5          | 5  | Yes |
| Wu 2017            | 3    | 3    |           | -     | 0, 1, 3, 7, 14                   | 5      | 2-20       |    | Yes |
| Kawai 2010         | 6    | 8    | 20-25     | 8-10  | 0, 1, 14, 28                     | 5      | 0-45       | 3  | Yes |
| Chen 2018          | 6    | 6    | -         | 6     | 7                                | 3      | 60         |    | Yes |
| Yang 2017          | 9-12 | 9-12 | -         | 8-12  | 0, 3, 5, 7                       | 5      | 4-120      | 3  | Yes |
| Huang 2014         | 14   | 14   | -         | -     | 0, 2, 4, 6, 8,<br>12, 16, 20, 24 | -      | 10-25      | 3  | -   |
| Dongxue 2020       | 4    | 10   | 20-25g    | -     | 0,1,3,7,14                       | -      | -          | -  | Yes |
| Gandin 2015        | 20   | 20   | -         | 9     | 0,1,3,5,7,9,11,<br>13,15         | 2      | 4-40       | 3  |     |
| Liu 2016           | 6    | 7    | -         | 19-20 | 14, 42                           | 5      | 4-40       | 5  | Yes |
| Feng 2020          | 14   | 10   | -         | -     | 0, 2, 21                         | 10     | 30         | 2  | Yes |
| Doll 2015          | 10   | 10   | 25-30     | 12-16 | 11                               | 5      | 4-44       | 4  | Yes |
| Liu 2011           | 9    | 9    | 25-30     | 20-24 | 0,1,2,3,7                        | 5      | -          | -  | Yes |
| Ma 2015            | 9    | -    | 20-25     | -     | 0,1,2,3,5,7,14,<br>21,28         | 6,5    | 10-14      | 3  | Yes |
| Xia 2019           | 10   | 10   | 25±2      | -     | 7                                | 5      | 4-40       | -  | Yes |
| Kawai 2010         | 6    | 8    | 20-25     | -     | 0,1,14,28                        | 5      | 0-45       | -  | Yes |
| Park 2014          | 7    | 12   | 25-32     | 13    | 0,2,4,7,14,21,2<br>8             | 4,16   | 4-40       | 3  | Yes |
| Wang 2015          | 6-8  | 6-8  | -         | -     | 0,3,5,7,9                        | 5      | 0-30       | -  | Yes |
| Chen 2017          | 12   | 12   | 23-25     | 8-10  | 21,28,42, 70                     | 5      | 5-40       | 10 | Yes |
| Doeppner<br>2014   | 15   | 16   | 23-25     | 10-12 | 4,7,14,28,56,8<br>4              | 5<br>1 | 4-40<br>40 | -  | -   |
| Kossatz 2018       | 14   | 21   | -         | 8-11  | 1,7                              | 1      | 4-20       | 5  | Yes |
| Oliveira 2020      | 8    | 8    | 25-35     |       | 0,7,28                           | 5      | 15         |    | Yes |
| Cunningham<br>2020 | 10   | 12   | 22,5-32,1 |       | 0,3,7,13                         | 5      | 4-40       | 3  | Yes |
| Campagne<br>1999   | 15   | 9    | -         | 8-10  | 21                               | 5      | 2-20       | 5  | Yes |
| Xu 2011            | 11   | 20   | 23-32     | -     | 0,2,7,14,21,28                   | 5      | 5-10       | 9  | Yes |

Supplementary Table S6

| Morris Water Maze   |      |         |            |         |                         |                  |                |                    |                     |                      |               |
|---------------------|------|---------|------------|---------|-------------------------|------------------|----------------|--------------------|---------------------|----------------------|---------------|
| Study / Year        | Sham | Control | Weight (g) | Age (w) | Test day                | Testing time (s) | Maze size (cm) | Platform size (cm) | Platform depth (cm) | Water temperature °C | Training/ day |
| Suenagaa-Young 2016 | 8    | 8       | -          | 10      | 16-20                   | 60               | 109            | 11                 | 1                   | 20±1                 | 3             |
| Truong 2012         | 10   | 4       | 20,3-25,3  | 4       | 55-59                   | 45               | 122            | 8,5                | 2                   | -                    | 4             |
| Sun 2020            | 12   | 12      | 20-15      | 8-12    | 23-27                   | 60               | -              | -                  | -                   | -                    | 5             |
| Yan 2021            | 9    | 8       | 20-22      | 6-8     | 1-6                     | 60               | 150            | -                  | 1                   | 22                   | 4             |
| Xu 2019             | 10   | 10      | 20-25      | -       | 22-28                   | 60               | -              | -                  | -                   | -                    | 4             |
| Jin 2021            | 5    | 5       | 20-25      | -       | 1                       | 60               | 100            | 12                 | -                   | 23±2                 | 4             |
| Feng 2020           | 19   | 19      | -          | 12-4    | 24-28                   | 60               | 120            | 15                 | 1                   | 19±2                 | 4             |
| Li 2018             | 10   | 16      | 22-19      | 10-14   | 22-26                   | 60               | 120            | 8                  | 1,5                 | 24-26                | 2             |
| Xia 2019            | 10   | 10      | 25±2       | -       | 1-6                     | 60               | -              | -                  | -                   | -                    | 4             |
| Wang 2015           | 6-8  | 6-8     | -          | -       | 24-28                   | 60               | -              | -                  | 2                   | 21-23                | 3             |
| Hu 2020             | -    | -       | 18-25      | 8       | 21-26                   | 60               | 120            | 6                  | 1                   | 21-23                | 4             |
| Doeppner 2014       | 15   | 16      | 23-25      | 10-12   | 26-28<br>54-56<br>82-84 | 90               | -              | -                  | -                   | -                    | 8             |
| Ahn 2015            | 10   | 10      | 20-25      | -       | 0,22-25                 | 90               | 100            | -                  | 0,5                 | -                    | 5             |

Supplementary Table S7

| Study               | D1 | D5 | D2 | D3 | D4 | D5 | Overall |
|---------------------|----|----|----|----|----|----|---------|
| Bok 2017            | !  | +  | +  | +  | !  | +  | !       |
| Chen 2018           | !  | +  | +  | +  | -  | +  | -       |
| Draxler 2019        | !  | +  | !  | +  | -  | +  | -       |
| Feng 2021           | !  | +  | +  | +  | !  | +  | !       |
| Geng 2020           | !  | +  | +  | +  | -  | +  | !       |
| Gil 2018            | !  | +  | !  | +  | -  | +  | -       |
| Guo 2018            | +  | +  | +  | +  | +  | +  | +       |
| Huang 2014          | !  | +  | +  | +  | -  | +  | !       |
| Kawai 2010          | !  | +  | !  | +  | -  | +  | !       |
| Li 2016             | !  | +  | +  | +  | -  | +  | !       |
| Liu 2015            | +  | +  | +  | +  | +  | +  | +       |
| Lu 2016             | +  | +  | !  | +  | -  | +  | !       |
| Patkar 2011         | +  | +  | +  | +  | +  | +  | +       |
| Shuang 2017         | !  | +  | !  | +  | !  | +  | !       |
| Suenagga-Young 2016 | +  | +  | +  | +  | +  | +  | +       |
| Truong 2012         | +  | +  | +  | +  | +  | +  | +       |
| Wong 2014           | +  | +  | +  | +  | +  | +  | +       |
| Wu 2017             | +  | +  | !  | +  | !  | +  | !       |
| Yang 2017           | +  | +  | +  | +  | +  | +  | +       |
| Zhang 2020          | !  | +  | +  | +  | +  | +  | +       |
| Zuoa 2019           | +  | +  | +  | +  | +  | +  | +       |
| Ahn 2015            | !  | +  | !  | +  | !  | +  | !       |
| Campagne 1999       | !  | +  | +  | +  | +  | +  | !       |
| Cao 2017            | !  | +  | +  | +  | +  | +  | +       |
| Chen 2017           | !  | +  | +  | +  | +  | +  | !       |
| Cheng 2021          | +  | +  | +  | +  | +  | +  | +       |
| Cunningham 2020     | +  | +  | +  | +  | +  | +  | +       |
| Doepfner 2014       | !  | +  | +  | +  | +  | +  | !       |
| Doll 2015           | +  | +  | +  | +  | +  | +  | +       |
| Dongxue 2020        | +  | +  | +  | +  | +  | +  | +       |
| Du 2021             | +  | +  | !  | +  | !  | +  | !       |
| Feng 2020           | !  | +  | +  | +  | +  | +  | !       |
| Gandin 2015         | !  | +  | +  | +  | +  | +  | !       |
| Hu 2020             | !  | +  | !  | +  | -  | +  | -       |
| Jin 2021            | +  | +  | !  | +  | !  | +  | !       |
| Kamat 2015          | !  | +  | !  | +  | -  | +  | -       |
| Kawai 2010          | !  | +  | !  | +  | -  | +  | -       |

Low risk  
 Some concerns  
 High risk

D1 Randomisation process  
D5 Bias arising from period and carryover effects  
D2 Deviations from the intended interventions  
D3 Missing outcome data  
D4 Measurement of the outcome  
D5 Selection of the reported result

|                     |   |   |   |   |   |   |   |
|---------------------|---|---|---|---|---|---|---|
| Kossatz 2018        | ! | + | + | + | + | + | ! |
| Li 2014             | + | + | + | + | + | + | + |
| Li 2018             | ! | + | + | + | + | + | ! |
| Liu 2011            | ! | + | ! | + | - | + | - |
| Liu 2016            | + | + | + | + | - | + | - |
| Liu 2018            | + | + | + | + | + | + | + |
| Ma 2015             | ! | + | + | + | + | + | ! |
| Nieuwenhuijzen 2021 | + | + | + | + | + | + | + |
| Oliveira 2020       | + | + | ! | + | - | + | - |
| Pallast 2020        | ! | + | + | + | + | + | ! |
| Park 2014           | ! | + | ! | + | - | + | - |
| Sun 2020            | ! | + | ! | + | - | + | - |
| Vahid-Ansari 2016   | + | + | + | + | + | + | + |
| Wang 2015           | + | + | + | + | + | + | + |
| Wang 2020           | + | + | + | + | + | + | + |
| Xia 2018            | ! | + | + | + | + | + | ! |
| Xu 2011             | + | + | ! | + | ! | + | ! |
| Xu 2019             | ! | + | ! | + | - | + | - |
| Yan 2021            | ! | + | ! | + | - | + | - |

Supplementary Table S8

| Tests | Time | Mean difference (95% CI) | p-value  | Forest plot                                                                                         |
|-------|------|--------------------------|----------|-----------------------------------------------------------------------------------------------------|
| Clark | 24 h | 9.76 (9.16, 10.36)       | <0.00001 | <p>Mean Difference<br/>IV, Fixed, 95% CI</p> <p>-20 -10 0 10 20<br/>Favours Stroke Favours Sham</p> |
|       | 48 h | 6.42 (4.41, 8.43)        | <0.00001 | <p>Mean Difference<br/>IV, Fixed, 95% CI</p> <p>-20 -10 0 10 20<br/>Favours Stroke Favours Sham</p> |

7 days    8.47 (7.57, 9.36)    <0.00001

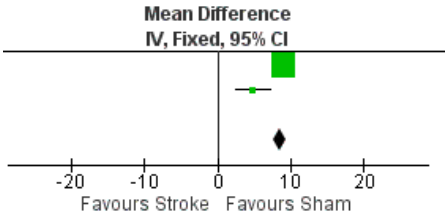

Cylinder    Pre    0.41 (-0.46, 1.28)    0.35

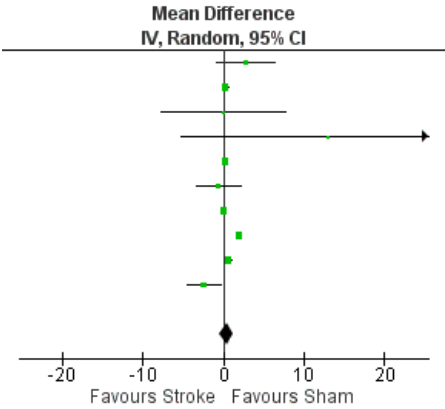

7 days    16.87 (13.78, 19.97)    <0.00001

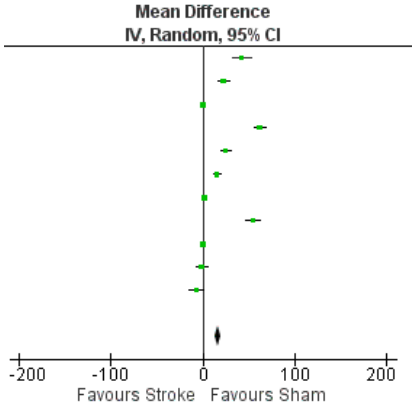

14 days    26.49 (24.75, 28.23)    <0.00001

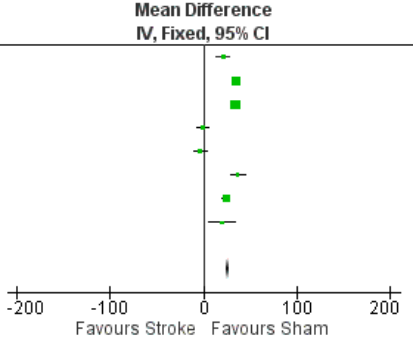



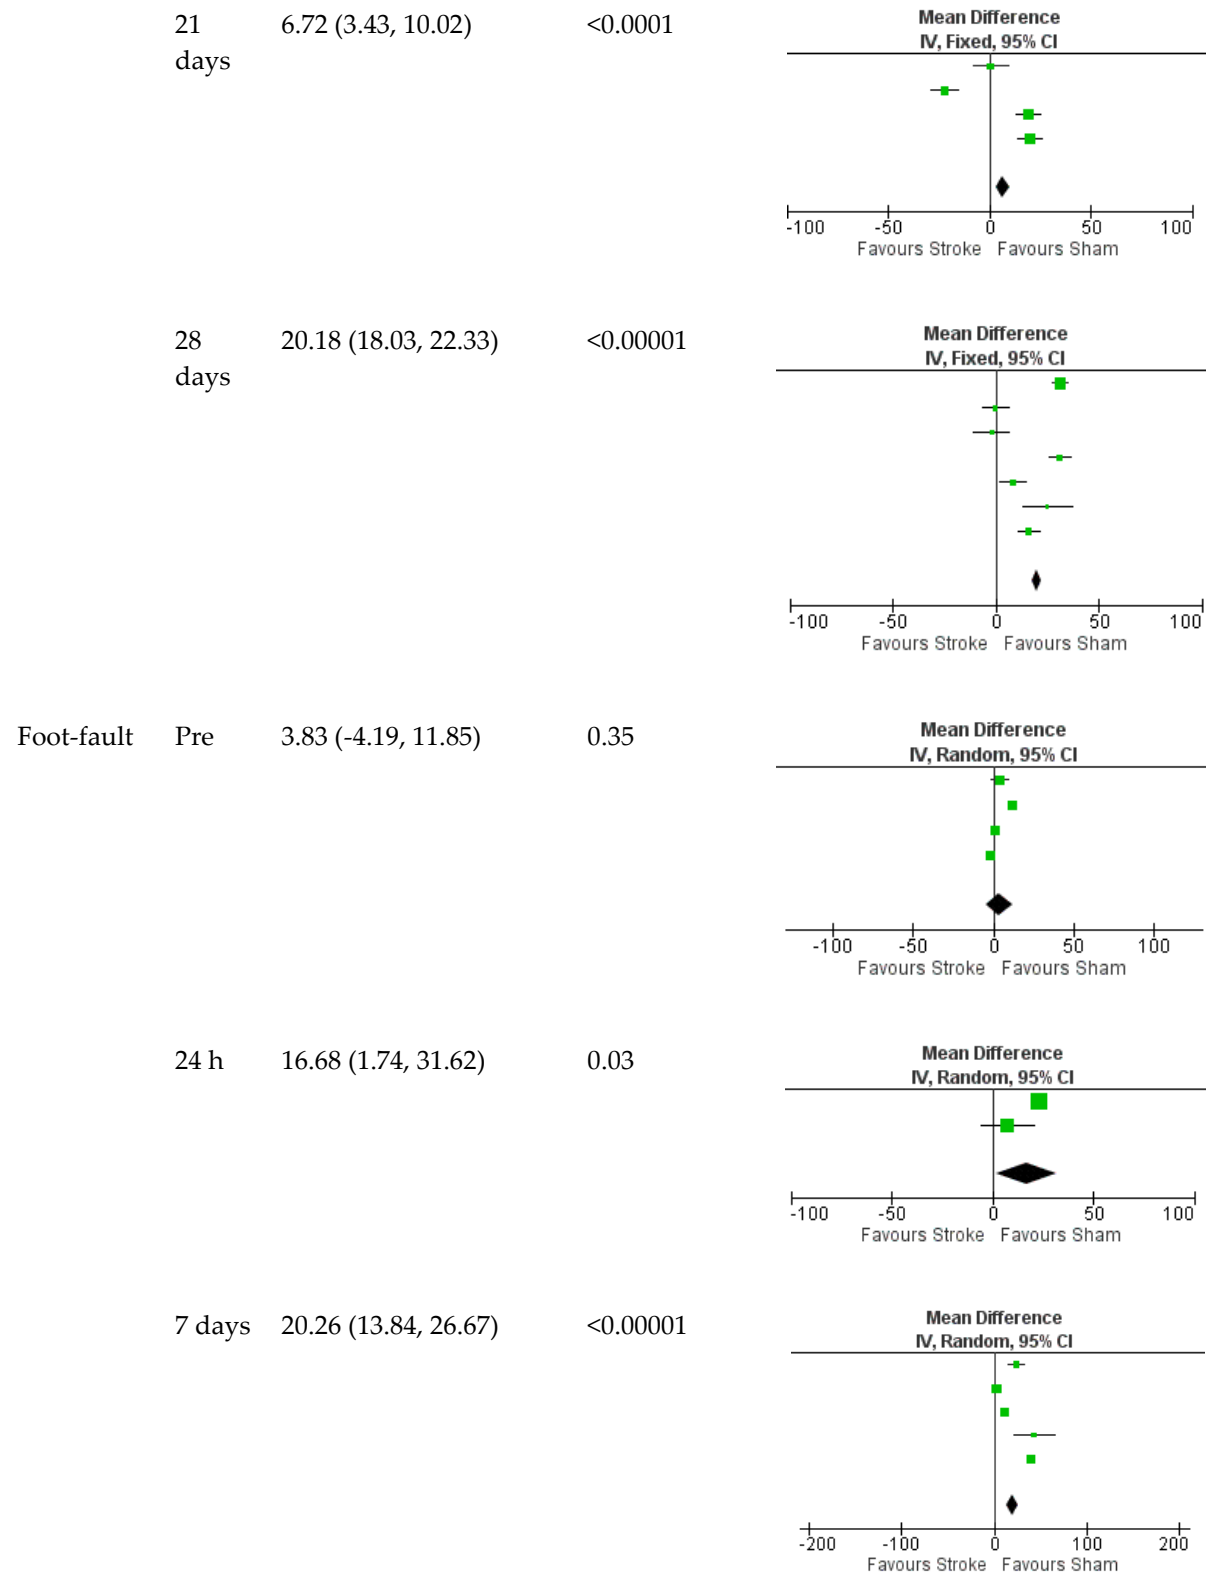

14 days 15.92 (6.85, 24.99) 0.0006

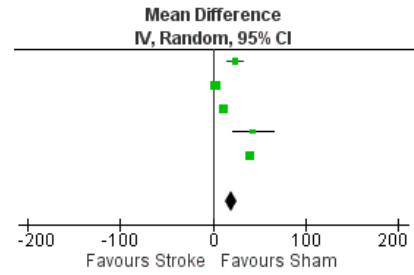

28 days 5.40 (2.88, 7.91) <0.0001

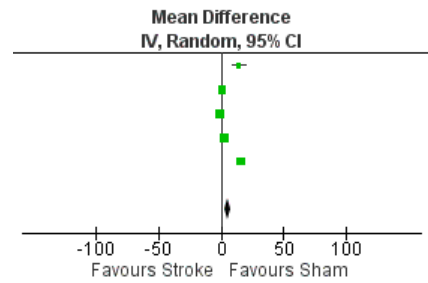

Garcia 24 h -7.71 (-14.67, -0.75) 0.03

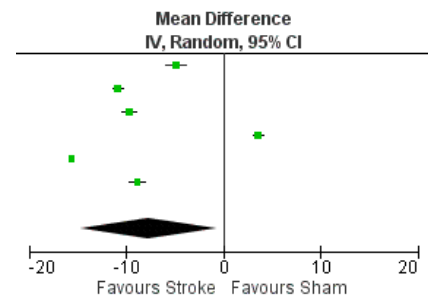

Longa 3 days 2.23 (0.52, 3.93) 0.01

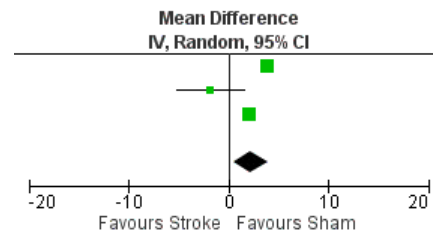

7 days 1.49 (-1.31, 4.30) 0.30

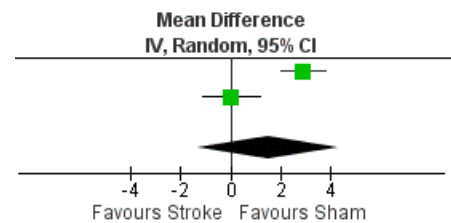

Rotarod      Pre      -0.68 (-1.95, 0.59)      0.30

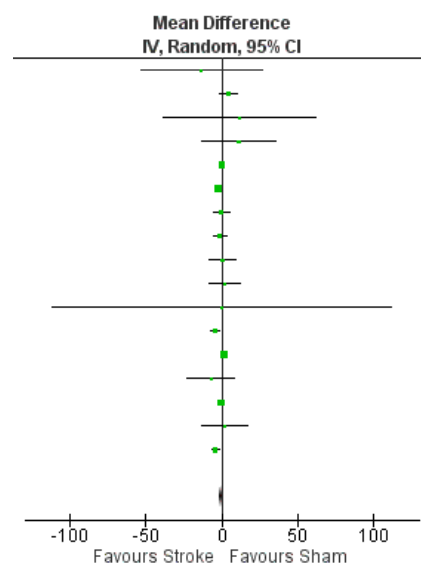

24 h      -64.64 (-117.80, -11.47)      0.02

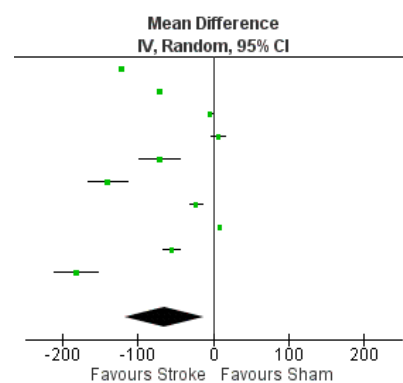

2 days      -67.97 (-108.91, -27.03)      0.001

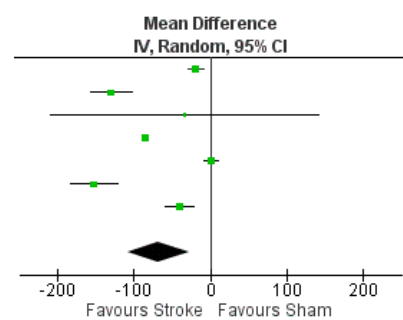

3 days -10.54 (-110.48, 89.41) 0.84

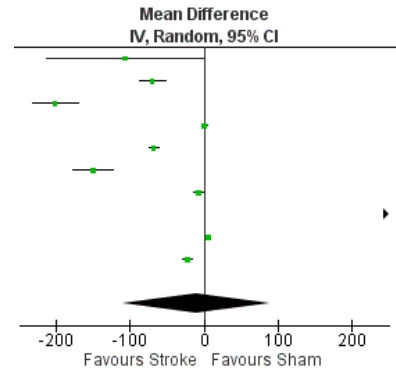

4 days -58.75 (-59.72, -57.77) <0.00001

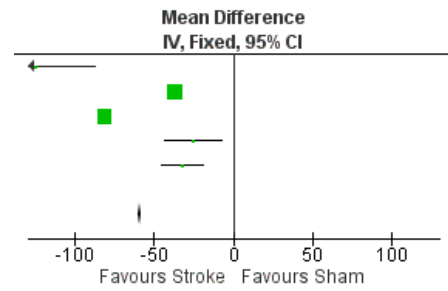

5 days -11.84 (-14.59, -9.09) <0.00001

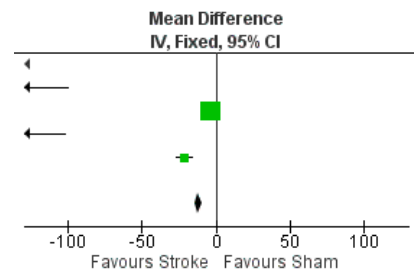

7 days -56.19 (-76.64, -35.75) <0.00001

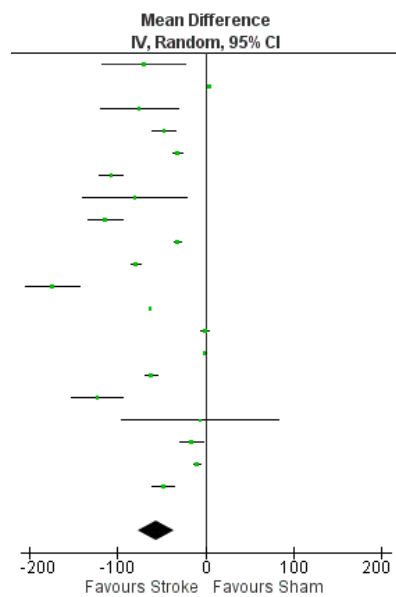

14 days      -31.51 (-40.81, -22.21)      <0.00001

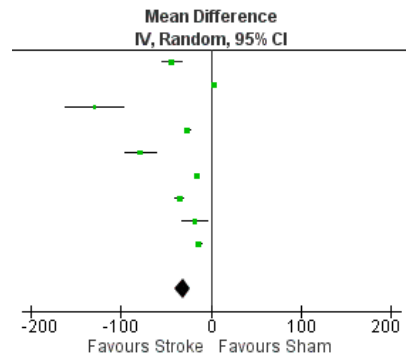

21 days      -28.89 (-54.62, -3.16)      0.03

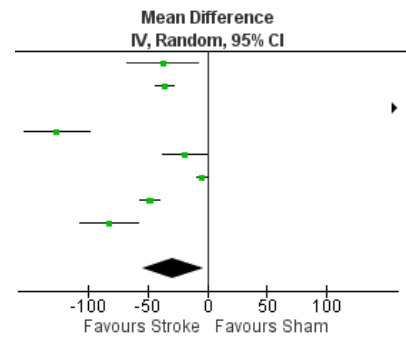

28 days      -45.11 (-62.20, -28.02)      <0.00001

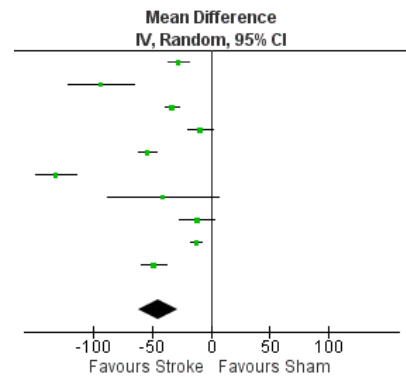

35 days      -17.57 (-21.93, -13.21)      <0.001

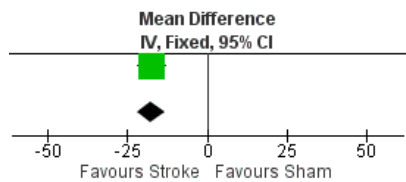

56 days      -32.49 (-48.16, -16.82)      <0.0001

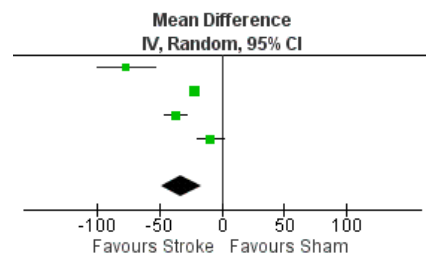

Morris  
Water  
Maze  
  
Latency

24 h      -4.19 (-7.33, -1.06)      0.009

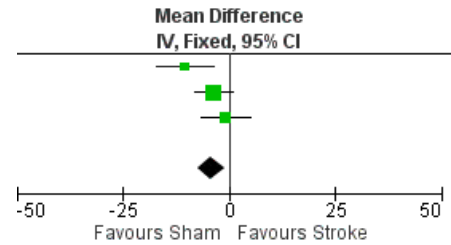

16 days      10.71 (6.09, 15.33)      <0.00001

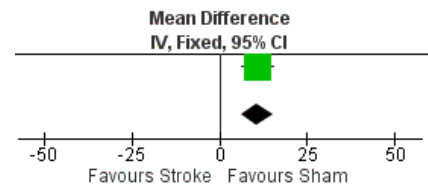

17 days      3.57 (-2.05, 9.19)      0.21

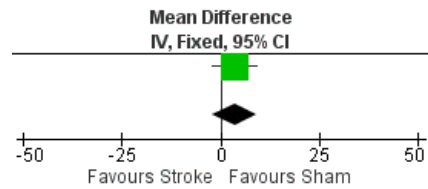

18 days      3.89 (-2.75, 10.53)      0.25

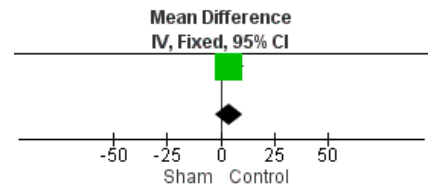

19 days      14.27 (10.69, 17.85)      <0.00001

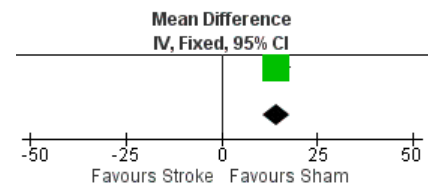

20 days      11.03 (7.51, 14.55)      <0.0001

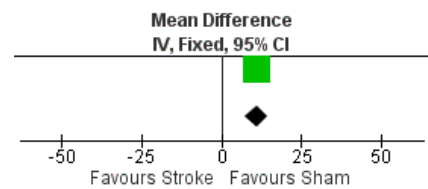

23 days      -10.84 (-12.33, -9.36)      <0.00001

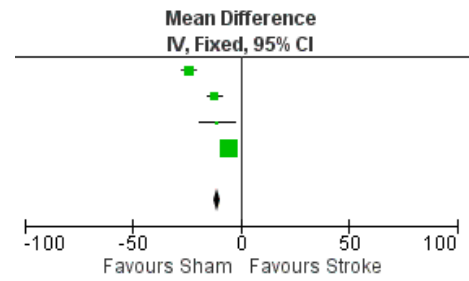

55 days      40.38 (35.16, 45.60)      <0.00001

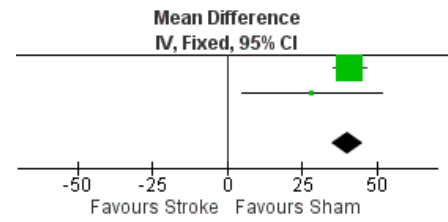

56 days      19.57 (14.21, 24.94)      <0.00001

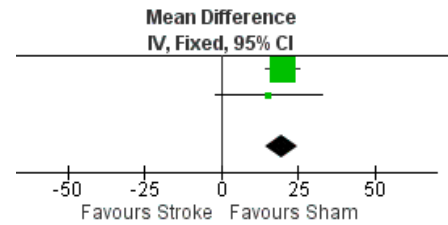

57 days      32.26 (20.20, 44.32)      <0.0001

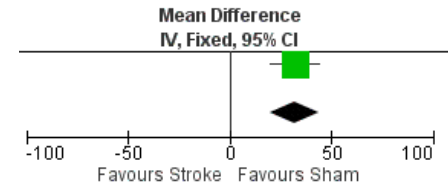

58 days      21.94 (12.53, 31.35)      <0.0001

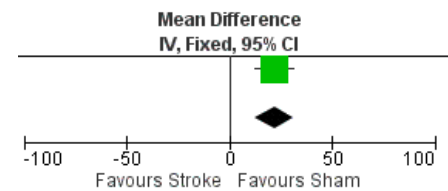

59 days      55.49 (47.26, 63.72)      <0.0001

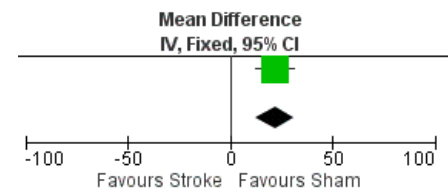

Morris  
Water  
Maze  
  
Velocity

0.02 (-0.19, 0.23)      0.87

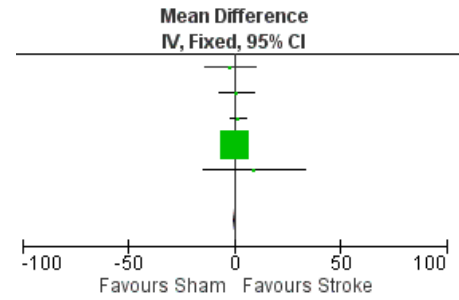

Morris  
Water  
Maze  
  
Target  
quadrant  
time

5.88 (-2.77, 14.52)      0.18

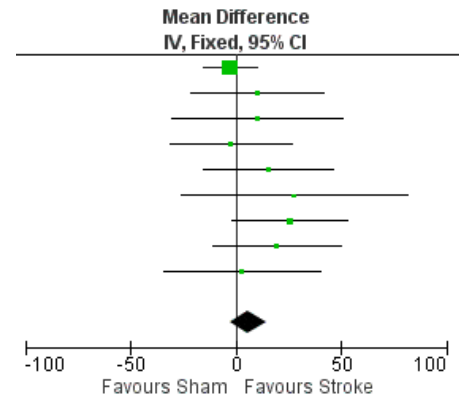

Supplement: s1 [file s1]
